# Supplementary material for: Investigation of the Biomechanical Properties of Circular Frames for the Foot
Source: Research Square preprint supplement (doi:10.21203/rs.3.rs-8532775/v1), 2026-02-17
Supplement: Supplementary file 1 [file b0c2e09e8ad93a389d1d8727.xlsx]

## Sheet: Readme and Comparisons
Data was collected at the University of Leeds School of Mechanical Engineering, Leeds, UK By Tom Irish, Supervised by Professor Todd Stewart and Dr. Peter Watson from the Institute of Medical and Biological Engineering
Frames were Manufactured by Sarah Johnson-lynn (South Tees Hospitals NHS Foundation Trust, Middlesbrough, UK) and Paul Harwood ( Leeds Teaching Hospitals Trust, Leeds, UK)
Components were provided by Orthofix UK ( Maidenhead, UK)
Frame 1 = Charcot																					S.D.
Frame 2 = Butt
Frame 3 = Mitre																					1	2	3	4
Frame 4 = Mitre with Secitoned Foot																					3.82484	12.5718	3.4869	30.6021
																					3.87276	11.544	3.9546	29.8329
																					3.66538	11.5156	4.57991	28.5342
																					3.38083	11.4304	4.67915	27.6041
																					3.29798	11.409	5.07934	27.1723
																					3.51274	11.2165	5.41939	28.0789
																					3.16902	9.83659	5.38386	28.9126
																					2.56148	7.42915	4.23276	29.2806
																					1	2	3	4
																					0.636519	1.19248	0.541209	3.99099
																					0.644493	1.09498	0.613802	3.89067
																					0.609982	1.09229	0.710857	3.72131
																					0.562628	1.08421	0.72626	3.6
																					0.548841	1.08218	0.788375	3.54369
																					0.58458	1.06392	0.841155	3.66192
																					0.527378	0.933032	0.835639	3.77065
																					0.426274	0.704679	0.656975	3.81864

## Sheet: Model 1 Average
	Step	Average_Force	Std_Force	Average_Position	Std_Position	Pos Zeroed		Stiffness (N/mm)	Stiffness S.D.
50	3	-50.0679	0.140276	13.7969	0.636519	0		31.344	3.82484
100	5	-100.064	0.166874	12.5857	0.644493	1.21119		38.6221	3.87276
200	7	-199.994	0.149908	10.4449	0.609982	3.35201		51.4862	3.66538
300	9	-300.006	0.145336	8.63634	0.562628	5.16058		62.354	3.38083
400	11	-400.01	0.157684	7.06064	0.548841	6.73629		71.8224	3.29798
500	13	-500.011	0.183279	5.65804	0.58458	8.13889		80.2506	3.51274
600	15	-600.017	0.140122	4.51113	0.527378	9.2858		87.1424	3.16902
700	17	-700.011	0.127882	3.56175	0.426274	10.2352		92.8472	2.56148

## Sheet: Model 1 Frame 1
	Step	Average_Force	Std_Force	Average_Position	Std_Position	Pos Zeroed		Stiffness (N/mm)	Stiffness S.D.
50	3	-50.0575	0.145005	13.5064	0.287972	0		27.108	2.12656
100	5	-100.085	0.159409	12.1839	0.190019	-1.32254		36.8744	1.40322
200	7	-200.008	0.164698	10.0214	0.153924	-3.48502		52.8435	1.13667
300	9	-300.028	0.163562	8.29145	0.124442	-5.21498		65.6185	0.918955
400	11	-400.012	0.147865	6.80415	0.101821	-6.70227		76.6016	0.751911
500	13	-500.018	0.228715	5.48509	0.0783995	-8.02133		86.3423	0.578949
600	15	-600.02	0.119171	4.41577	0.083677	-9.09065		94.2388	0.617921
700	17	-700.017	0.116092	3.56722	0.072476	-9.9392		100.505	0.535206

## Sheet: Model 1 Frame 2
	Step	Average_Force	Std_Force	Average_Position	Std_Position	Pos Zeroed		Stiffness (N/mm)	Stiffness S.D.
50	3	-50.069	0.120966	14.2593	0.608019	0		41.759	2.69595
100	5	-100.055	0.172618	13.1792	0.568803	-1.0801		46.5482	2.52207
200	7	-199.976	0.138963	11.2027	0.522651	-3.05664		55.3121	2.31743
300	9	-299.991	0.136968	9.49134	0.467605	-4.76798		62.9002	2.07336
400	11	-400.005	0.190109	7.97978	0.396151	-6.27954		69.6025	1.75653
500	13	-500.015	0.151414	6.61138	0.310821	-7.64794		75.6699	1.37818
600	15	-599.996	0.200389	5.34816	0.216271	-8.91116		81.2711	0.958945
700	17	-700.002	0.145308	4.14544	0.0724708	-10.1139		86.604	0.321336

## Sheet: Model 1 Frame 3
	Step	Average_Force	Std_Force	Average_Position	Std_Position	Pos Zeroed		Stiffness (N/mm)	Stiffness S.D.
50	3	-50.0766	0.154631	13.6545	0.92865	0		27.968	5.2322
100	5	-100.052	0.167466	12.4615	0.904178	-1.193		34.6896	5.09432
200	7	-199.997	0.144594	10.2106	0.790038	-3.44395		47.3719	4.45123
300	9	-300	0.134107	8.22728	0.664653	-5.42724		58.5461	3.74479
400	11	-400.013	0.137852	6.47823	0.521976	-7.17629		68.4006	2.94092
500	13	-499.998	0.179758	4.90138	0.422275	-8.75314		77.2849	2.37918
600	15	-600.028	0.120674	3.7892	0.29034	-9.86531		83.5512	1.63584
700	17	-700.015	0.12551	2.95633	0.090132	-10.6982		88.2437	0.507822

## Sheet: Model 2 Average
	Step	Average_Force	Std_Force	Average_Position	Std_Position	Pos Zeroed		Stiffness (N/mm)	Stiffness S.D.
50	3	-50.0255	0.106838	12.056	1.19248	0		46.911	12.5718
100	5	-100.03	0.130525	11.5142	1.09498	0.541704		52.622	11.544
200	7	-199.999	0.0993042	10.1237	1.09229	1.93227		67.2821	11.5156
300	9	-299.998	0.0993394	8.62246	1.08421	3.43349		83.1089	11.4304
400	11	-400.012	0.0987177	7.29736	1.08218	4.75859		97.0789	11.409
500	13	-500.017	0.110758	6.12447	1.06392	5.93148		109.444	11.2165
600	15	-600.013	0.123563	5.41838	0.933032	6.63757		116.888	9.83659
700	17	-700.028	0.118444	4.9367	0.704679	7.11925		121.966	7.42915
															-6.636	-36.962	-109.83
															10.5426	-46.911

## Sheet: Model 2 Frame 1
	Step	Average_Force	Std_Force	Average_Position	Std_Position	Pos Zeroed		Stiffness (N/mm)	Stiffness S.D.
50	3	-50.001	0.0927879	12.0124	0.866117	0		32.472	13.3403			-115.46
100	5	-100.026	0.135146	11.3764	0.563974	-0.636052		42.2687	8.68656			-87.6544
200	7	-200.003	0.0944257	9.81455	0.401641	-2.19788		66.3247	6.18623			-51.7156
300	9	-300.002	0.0866045	8.3485	0.301375	-3.66393		88.9054	4.6419			-59.7992
400	11	-400.014	0.0918702	7.08951	0.182532	-4.92293		108.297	2.81142			-99.0615
500	13	-500.018	0.110955	5.92962	0.0905214	-6.08281		126.162	1.39425			-161.664
600	15	-600.025	0.130126	5.48021	0.0225549	-6.53223		133.084	0.3474			-192.733
700	17	-700.027	0.119357	5.17535	0.00837457	-6.83709		137.78	0.128988			-215.975
																	-9.4206	-49.708	-115.46
																	15.4024	-32.472

## Sheet: Model 2 Frame 3
	Step	Average_Force	Std_Force	Average_Position	Std_Position	Pos Zeroed		Stiffness (N/mm)	Stiffness S.D.
50	3	-50.0171	0.100831	13.8123	1.16459	0		65.344	3.87062
100	5	-100.027	0.140777	13.2235	0.898334	-0.588726		67.3007	2.9857
200	7	-200.016	0.0856622	11.9334	0.561717	-1.87885		71.5885	1.86692
300	9	-300.018	0.0928786	10.4451	0.541973	-3.36711		76.5349	1.8013
400	11	-400.014	0.100162	9.07994	0.472316	-4.73232		81.0723	1.56979
500	13	-500.006	0.0923848	7.81161	0.346004	-6.00065		85.2878	1.14998
600	15	-600.004	0.0948761	6.72127	0.215277	-7.09099		88.9116	0.715494
700	17	-700.035	0.109121	5.73016	0.137627	-8.0821		92.2057	0.457417
													-1.6854	-10.441	-85.953
													3.3236	-65.344

## Sheet: Model 2 Frame 2
	Step	Average_Force	Std_Force	Average_Position	Std_Position	Pos Zeroed		Stiffness (N/mm)	Stiffness S.D.
50	3	-50.0615	0.123234	10.5515	0.846974	0		49.436	9.60808
100	5	-100.037	0.120261	10.0676	0.756947	-0.483907		54.9254	8.58681
200	7	-199.973	0.119279	8.83372	0.387515	-1.71774		68.9221	4.39597
300	9	-299.969	0.121759	7.33495	0.269732	-3.21651		85.9241	3.05984
400	11	-400.007	0.105468	5.98287	0.17913	-4.56859		101.262	2.03205
500	13	-500.031	0.134761	4.81974	0.130582	-5.73172		114.457	1.48132
600	15	-600.014	0.154102	4.16364	0.00931683	-6.38783		121.899	0.10569
700	17	-700.021	0.127787	3.88211	0.00839489	-6.66935		125.093	0.0952316
															-10.2174	-57.366	-134.54
															11.344	-49.436

## Sheet: Model 3 Average
	Step	Average_Force	Std_Force	Average_Position	Std_Position	Pos Zeroed		Stiffness (N/mm)	Stiffness S.D.
50	3	-50.0143	0.11372	9.8552	0.541209	0		53.184	3.4869
100	5	-100.049	0.109371	9.07871	0.613802	0.776489		58.1868	3.9546
200	7	-200.007	0.0984476	7.57236	0.710857	2.28285		67.8919	4.57991
300	9	-299.998	0.0995784	6.13236	0.72626	3.72285		77.1695	4.67915
400	11	-400.016	0.104239	4.86178	0.788375	4.99343		85.3557	5.07934
500	13	-500.018	0.105335	3.67425	0.841155	6.18095		93.0066	5.41939
600	15	-600.023	0.108414	2.62774	0.835639	7.22747		99.7491	5.38386
700	17	-700.018	0.117439	1.81863	0.656975	8.03657		104.962	4.23276
															6.4428	-53.184

[truncated: 7 more sheets: Model 3 Frame 1, Model 3 Frame 2, Model 3 Frame 3, Model 4 Average, Model 4 Frame 1, Model 4 Frame 2, Model 4 Frame 3]
